# Supplementary material for: Cervicovaginal Microbiome Composition Is Associated with Metabolic Profiles in Healthy Pregnancy
Source: PubMed Central journal article supplement (PMC7448280; doi:10.1128/mbio.01851-20), 2020-08-25
Supplement: mBio.01851-20-sf005.pdf [file mBio.01851-20-sf005.pdf]

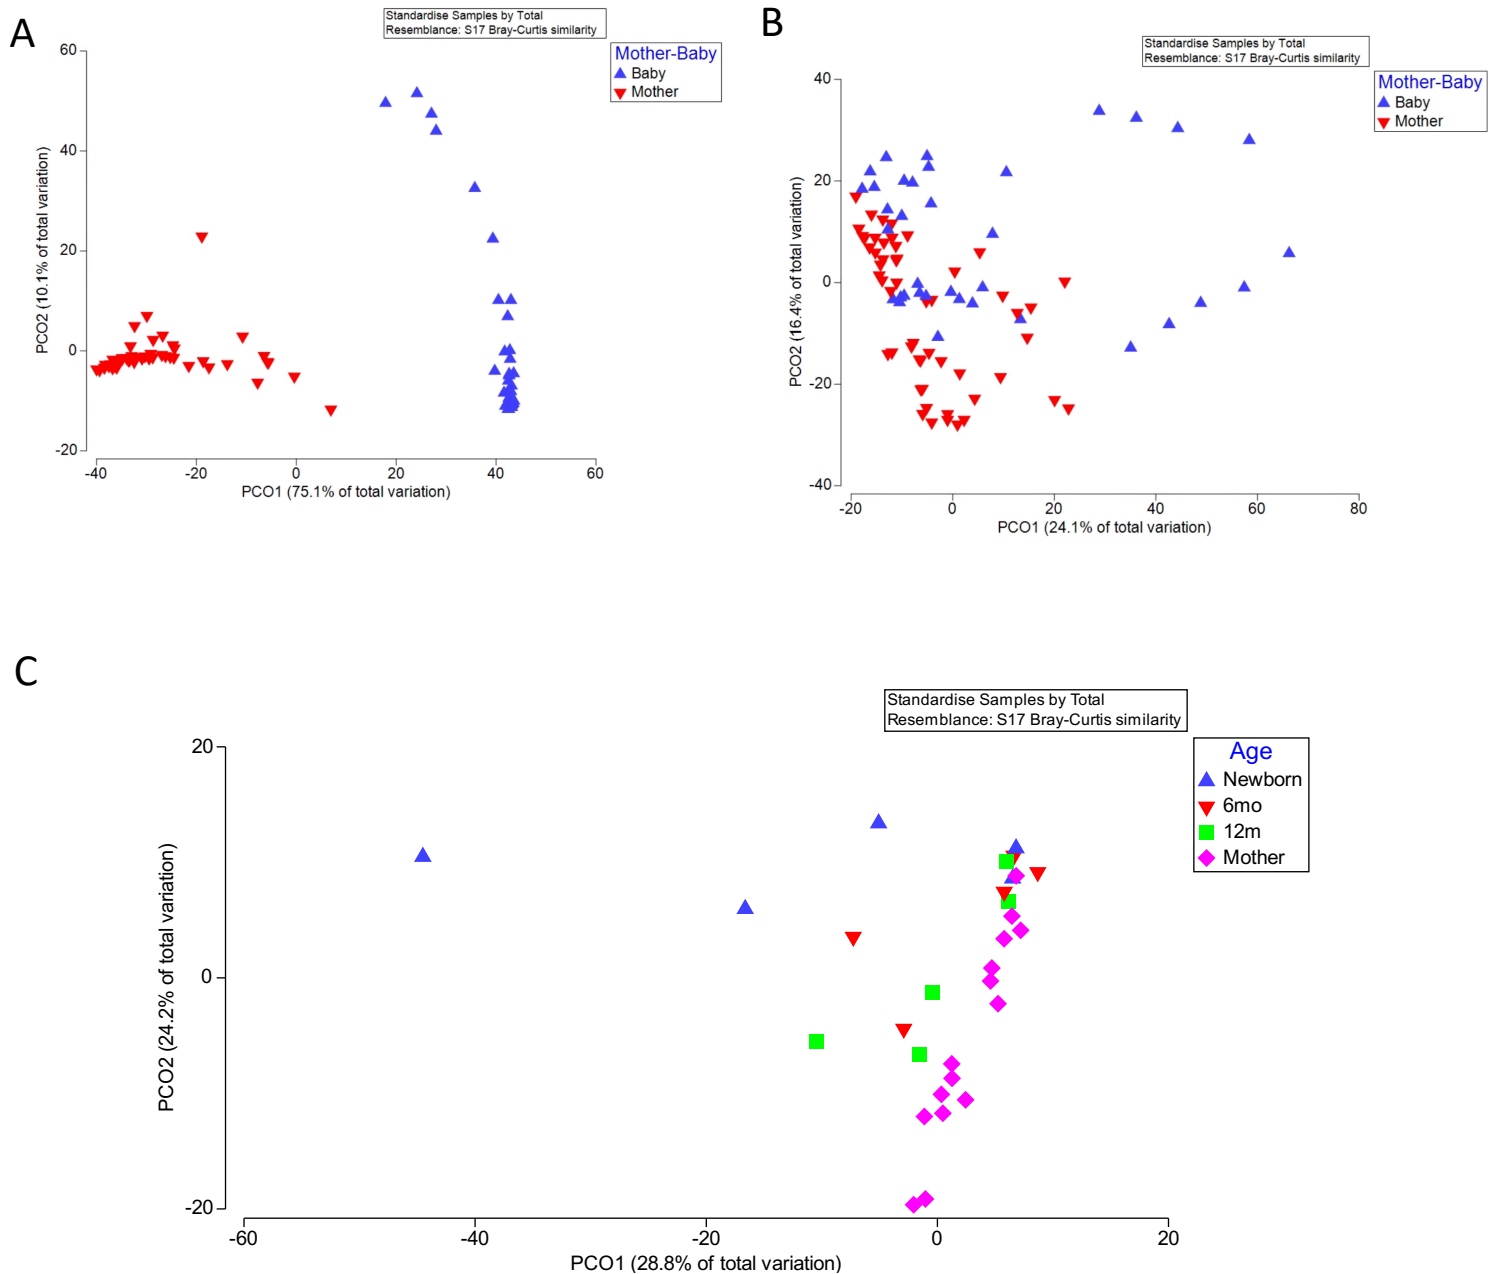

**Supp. Fig. 5:** A) Principle coordinates ordination of saliva LC-MS/MS lipidomics, colored by whether the sample originated from mother or child. B) Principle coordinates ordination of saliva metabolomes by GC-TOF, colored by whether the sample originated from mother or child. C) Principle coordinates ordination of urine lipidomes, colored by age. All timepoints for mothers (n=15 samples) were used (i.e. Trimesters 1-3).
