# Supplementary material for: Cervicovaginal Microbiome Composition Is Associated with Metabolic Profiles in Healthy Pregnancy
Source: PubMed Central journal article supplement (PMC7448280; doi:10.1128/mbio.01851-20), 2020-08-25
Supplement: mBio.01851-20-sf006.pdf [file mBio.01851-20-sf006.pdf]

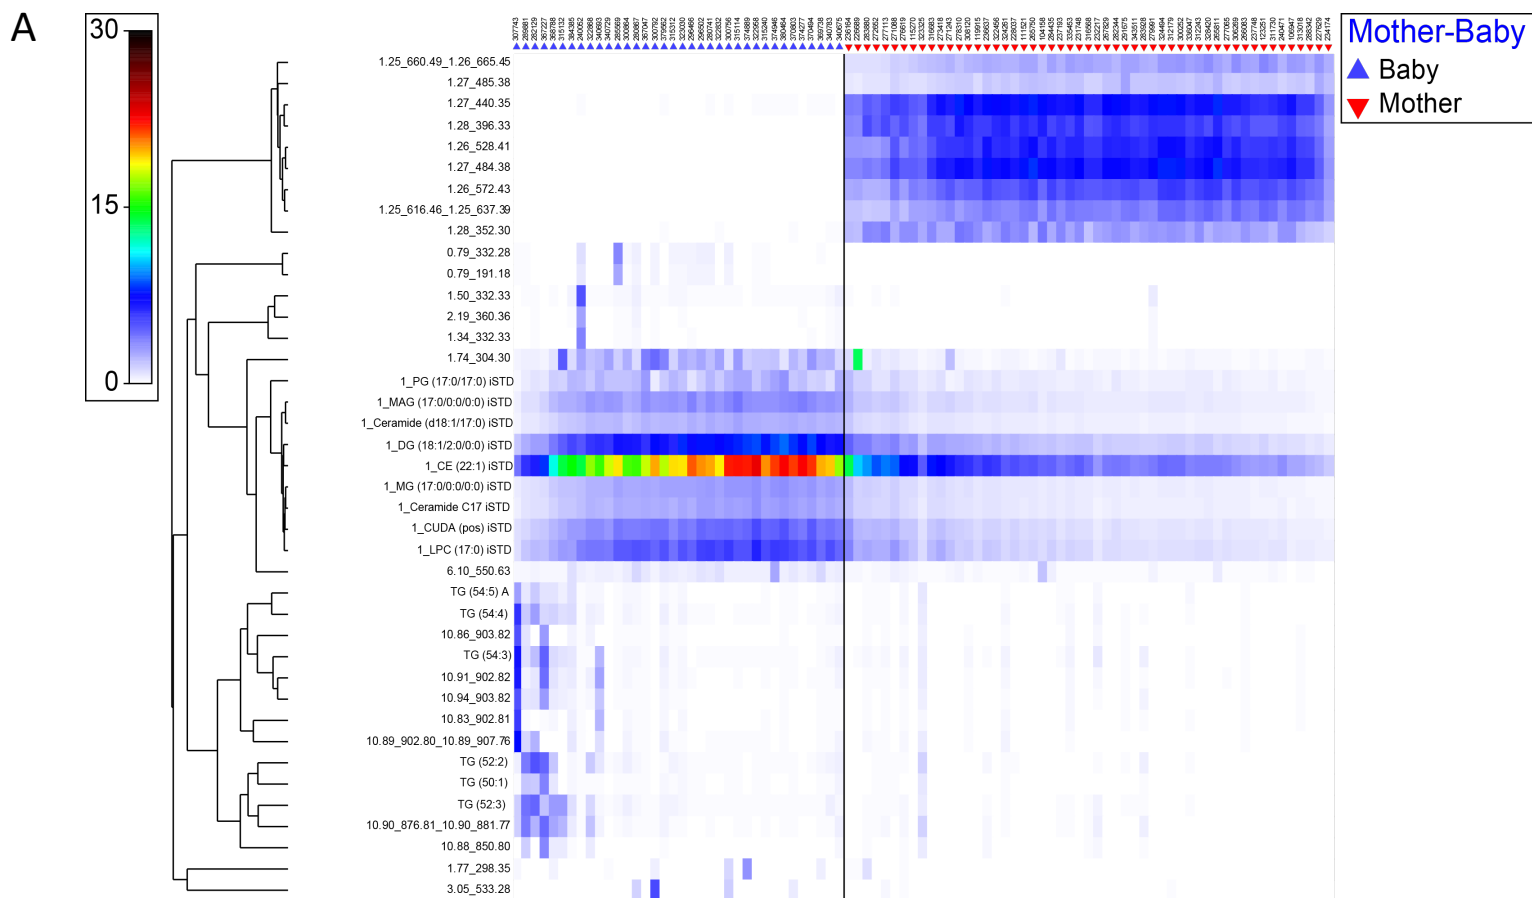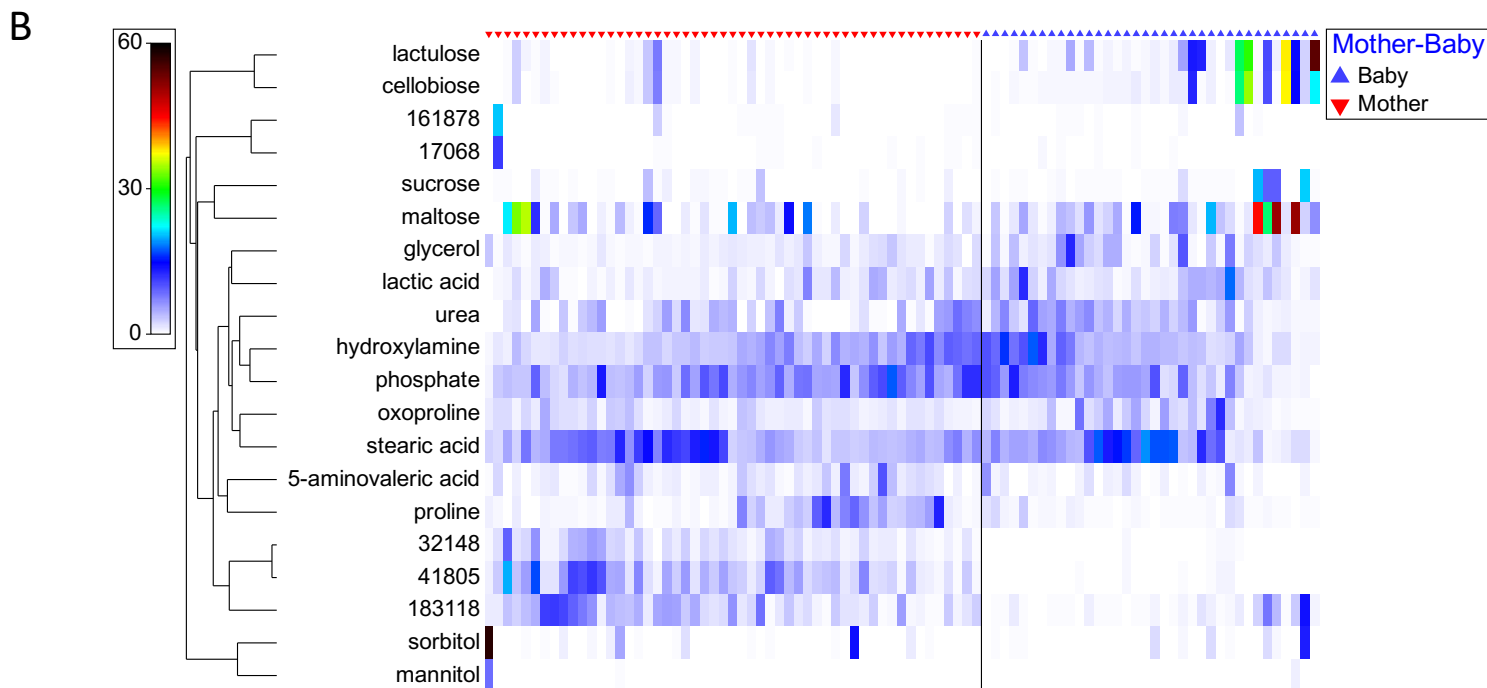

**Supp. Fig. 6:** A) Analysis of the top 50 lipidomic metabolites and B) 20 top GC-TOF metabolites from saliva that had the highest mean abundance across all samples using Primer-e software. Metabolites were initially standardized within each sample, and then across metabolites. Color indicates this normalized abundance of the metabolite. When present, annotations were used for data.
